# Supplementary material for: DeepConsensus improves the accuracy of sequences with a gap-aware sequence transformer
Source: Springer Nature journal article supplement (doi:10.1038/s41587-022-01435-7), 2022-09-01
Supplement: 41587_2022_1435_MOESM1_ESM.pdf [file 41587_2022_1435_MOESM1_ESM.pdf]

---

**Supplementary information**

---

**DeepConsensus improves the accuracy of sequences with a gap-aware sequence transformer**

---

In the format provided by the authors and unedited

# Supplementary Notes

## Software commands

### Generating DeepConsensus input files with pbmm2 and samtools

We started with the subreads BAM and CCS reads BAM files output by pbccs. Samtools v1.1 was used to convert the CCS reads BAM to a FASTA:

```
samtools fasta "ccs.bam" > "ccs.fasta"
```

We used actc v0.0.2 and pbmm2 v1.4.0 for mapping subreads to CCS reads using the following commands:

```
actc -j "$(nproc)" "subreads.bam" "ccs.bam" "aligned.subreads.bam"
```

```
pbmm2 align --sample "sample" --preset SUBREAD --sort "ccs.fasta"  
"subreads.bam" "aligned.subreads.bam"
```

Only subread alignments to the correct molecule were retained. We used samtools and awk to filter incorrect alignments using the below command:

```
samtools view -h "aligned.subreads.bam" | \  
awk '{ if($1 ~ /^@/) { print; } else { split($1,A,"/"); \  
split($3,B,"/"); if(A[2]==B[2]) { split(A[3],C,"_"); \  
print $0 "\tqs:i:" C[1]; } } }'
```

### Running inference with DeepConsensus

DeepConsensus v0.1 was run with the following command:

```
python3 -m deepconsensus.scripts.run_deepconsensus \  
--input_subreads_aligned=subreads.aligned.bam \  
--input_subreads_unaligned=subreads.bam \  
--input_ccs_fasta=ccs.fasta \  
--output_directory=deepconsensus_output \  
--checkpoint=model-50
```

The outputs are sharded FASTQs, which are concatenated together with cat to produce the final FASTQ.

### Aligning DeepConsensus predictions with pbmm2

DeepConsensus predictions and CCS reads from pbccs were mapped to the HG002 diploid assembly or reference genome using the below command. The `--unmapped` flag was added to the below command for assembly and variant calling analysis pipelines:

```
pbmm2 align --sample "sample" --preset HIFI --sort -c 0 -y 70
"ref.fa" "query.reads.fasta" "aligned.reads.bam"
```

## Generating phased diploid assemblies with hifiasm

HiFiasm (version 0.15.3-r339) was run with the following command to generate the diploid human genome assemblies:

```
hifiasm -o "outputPrefix" -t "nThreads" "reads.fastq"
```

We ran the following commands to convert the output GFA files to fasta files.

For the primary assembly we used:

```
awk '/^S/{print ">"$2;print $3}' "outputPrefix.bp.p_ctg.gfa" >
"outputPrefix.bp.p_ctg.fa"
```

For the haplotype-resolved GFA files for the diploid sample, we used the following commands to get haplotype-resolved assembly:

```
awk '/^S/{print ">"$2;print $3}' "outputPrefix.bp.hap1.p_ctg.gfa" >
"outputPrefix.bp.hap1.p_ctg.fa"
```

```
awk '/^S/{print ">"$2;print $3}' "outputPrefix.bp.hap2.p_ctg.gfa" >
"outputPrefix.bp.hap2.p_ctg.fa"
```

## Reference free assembly quality estimation with YAK

We used yak (version 0.1-r62-dirty) to derive estimated consensus accuracy (Q) of the assemblies.

To evaluate the assembly of a sample we first built the k-mer database from Illumina paired-end short reads of the same sample using this command:

```
yak count -b37 -t32 -o "KMER_DB" <(zcat sr*.fq.gz) <(zcat sr*.fq.gz)
```

Then we estimated the quality of the phased assembly using the following command:

```
yak qv -t "nThreads" -p -K 3.2g -l 100k "KMER_DB"
"outputPrefix.bp.hap1.p_ctg.fa" > "outputPrefix.hap1.yak.qv.txt"
```

```
yak qv -t "nThreads" -p -K 3.2g -l 100k "KMER_DB"
"outputPrefix.bp.hap2.p_ctg.fa" > "outputPrefix.hap2.yak.qv.txt"
```

From the outputs "outputPrefix.hap1.yak.qv.txt" and "outputPrefix.hap2.yak.qv.txt" we reported the balanced error as the quality of the assembly we evaluated.

## Assembly-based small variant calling assessment using dipcall

We used dipcall (version 0.3) to derive small variants from the phased assemblies.

For male samples such as HG002, HG003, HG006, we used the following command:

```
dipcall.kit/run-dipcall -x dipcall.kit/hs38.PAR.bed  
"outputPrefix.dipcall_output" "reference"  
"outputPrefix.bp.hap1.p_ctg.fa" "outputPrefix.bp.hap2.p_ctg.fa" >  
dipcall_instructions.mak
```

```
make -j2 -f dipcall_instructions.mak
```

For female samples such as HG004, HG007 we used the following command:

```
dipcall.kit/run-dipcall "outputPrefix.dipcall_output" "reference"  
"outputPrefix.bp.hap1.p_ctg.fa" "outputPrefix.bp.hap2.p_ctg.fa" >  
dipcall_instructions.mak
```

```
make -j2 -f dipcall_instructions.mak
```

From the output we compared `outputPrefix.dipcall_output.dip.vcf.gz` variant call set against GIAB truth set using `hap.py` small variant evaluation program. For all samples, we used GIAB v4.2.1 benchmarking set and GRCh38 as the reference. The command for `hap.py` is provided in the associated section.

## Gene completeness assessment with asmgene

We assessed the gene completeness of the phased assemblies with `asmgene` (version v2.21).

We first aligned the [Ensembl cDNA sequences](#) to the GRCh38 reference genome using `minimap2` (v2.21) using the following command:

```
minimap2 -cxsplice:hq -t32 "GRCh38.fa" "homo_sapiens_cdna.fa" >  
"asmgene_output_prefix.ref.cdna.paf"
```

Then we align the cDNA sequences to each haplotype of the phased assemblies.

```
minimap2 -cxsplice:hq -t32 "outputPrefix.bp.hap1.p_ctg.fa"  
"homo_sapiens_cdna.fa" > "asmgene_output_prefix.HAP1.cdna.paf"
```

```
minimap2 -cxsplice:hq -t32 "outputPrefix.bp.hap2.p_ctg.fa"  
"homo_sapiens_cdna.fa" > "asmgene_output_prefix.HAP2.cdna.paf"
```

Then we use `asmgene` tool available from `paftools.js` to derive the gene completeness metrics for each haplotype.

```
paftools.js asmgene -a "asmgene_output_prefix.ref.cdna.paf"  
"asmgene_output_prefix.HAP1.cdna.paf" >  
"asmgene_output_prefix.hap1.genestats"
```

```
paftools.js asmgene -a "asmgene_output_prefix.ref.cdna.paf"  
"asmgene_output_prefix.HAP2.cdna.paf" >  
"asmgene_output_prefix.hap2.genestats"
```

## Assembly statistics with QUASt

We used QUASt (version v5.0.2) to derive the assembly size, N50 and NG50 metrics of the assembly against the GRCh38 reference sequence. For the assembly size, N50 and NG50 values, we used the primary assembly we get from hifiasm assembler. We run the following command to derive the assembly metrics:

```
python /root/tools/quast/quast-5.0.2/quast-lg.py -t "nThreads" -o
"QUAST_output_directory" -r "GRCh38.fa" --large
outputPrefix.bp.p_ctg.fa
```

Within the output directory the `report.txt` file contains the assembly size, N50 and NG50 numbers that we report in our evaluation.

## Variant calling with DeepVariant

We ran DeepVariant with the provided [convenience script](#) to call variants. Here is the command used:

```
/opt/deepvariant/bin/run_deepvariant --model_type="PACBIO"
--use_hp_information --ref="ref.fa" --reads="reads.bam"
--output_vcf="output.vcf" --num_shards="$(nproc) "
```

For the pbccs baseline, we used the latest DeepVariant model for PacBio data, v1.2. For DeepConsensus, we trained a custom model which was specified using the `--customized_model` in the above command.

Variant calls were evaluated using v0.3.12 of hap.py from the jmcdani20/hap.py Docker image. The command used was:

```
/opt/hap.py/bin/hap.py "truth.vcf" "output.vcf" -f "truth.bed" -r
"ref.fa" -o "output/happy.output"
--stratification="v2.0-GRCh38-stratifications.tsv" --engine=vcfEval
--pass-only
```

Truth VCF and BED files come from the [Genome in a Bottle](#) (GIAB) truth sets. The v4.2.1 truth set was used for all samples.

## Comparison with *Lal et al.*

Sequence data from *Lal et al* was retrieved from

[https://nv-pacbio.s3.us-east-2.amazonaws.com/paper\\_results.zip](https://nv-pacbio.s3.us-east-2.amazonaws.com/paper_results.zip). The file

`sequelii_after.fastq` consists of reads polished using the approach presented in *Lal et al.*

We extracted 760 of 3,586 reads that aligned to chromosome 20, which was present in both our test dataset and the *Lal et al.* test dataset. We then ran bamConcordance to compare the accuracy of both approaches. We calculate base pair errors (bp-errors) as the sum of the lengths of mismatch and indel errors.

# Supplementary results

## Supplementary figures

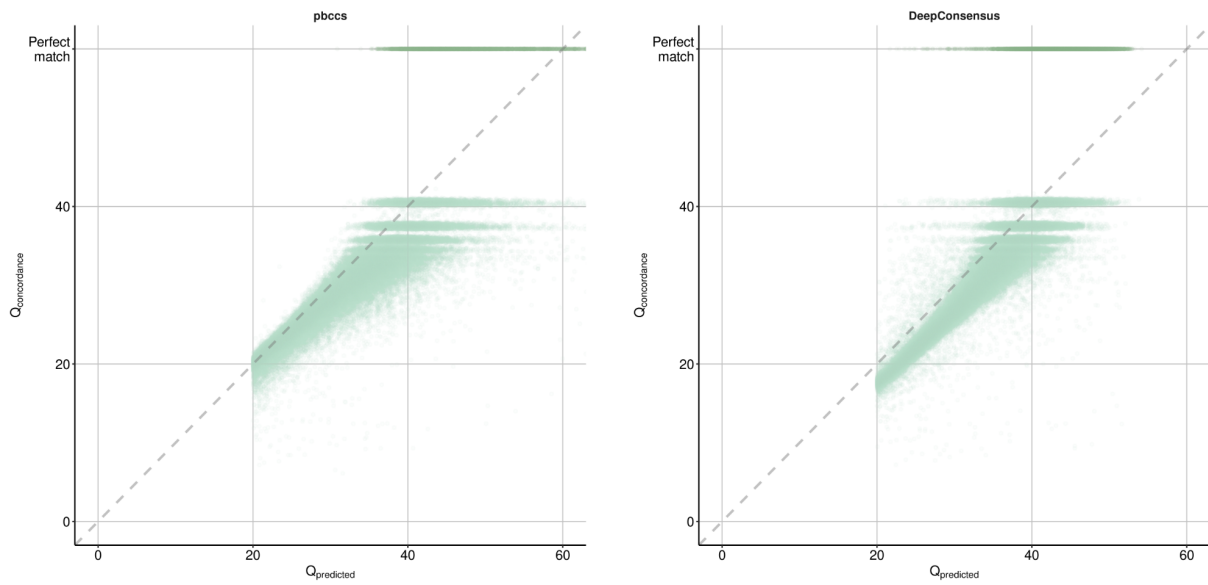

**Supplementary Figure 1:** The observed read quality ( $Q_{concordance}$ ) and predicted read quality ( $Q_{predicted}$ ) are plotted against one another for both pbccs and DeepConsensus. Reads are from HG002 chr20 and have a length of 11kb.

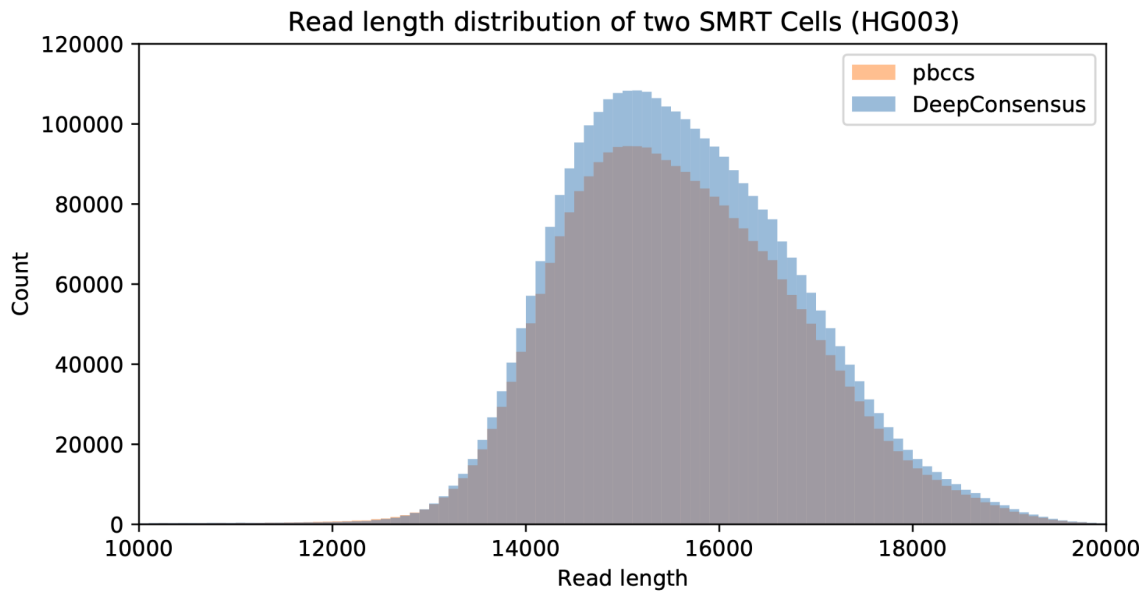

**Supplementary Figure 2:** Read length distribution of HG003 two SMRT Cells reads from pbccs and DeepConsensus.

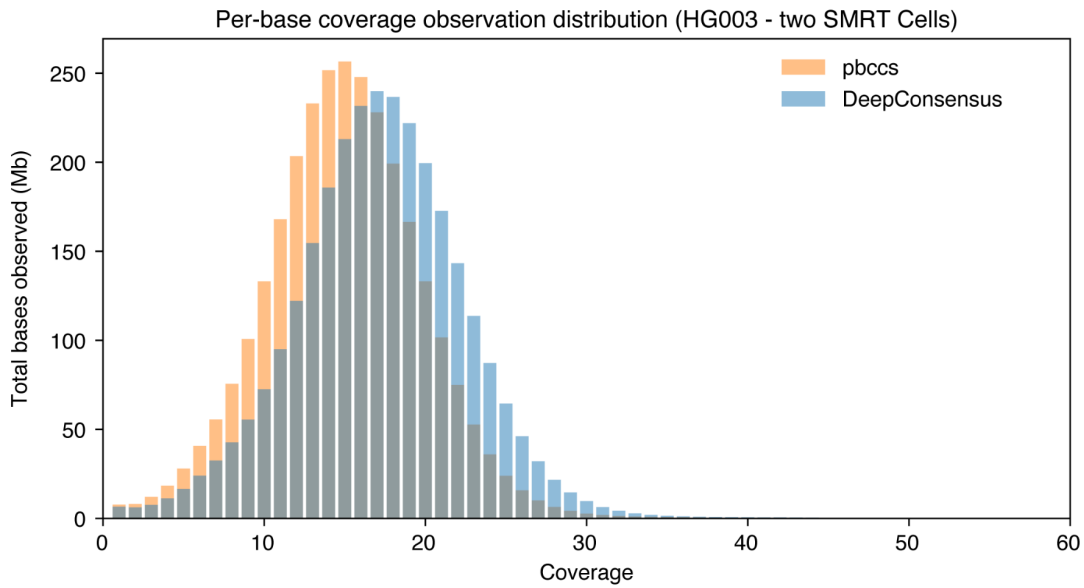

**Supplementary Figure 3:** Distribution of observed coverage of HG003 two SMRT Cells reads from pbccs and DeepConsensus.

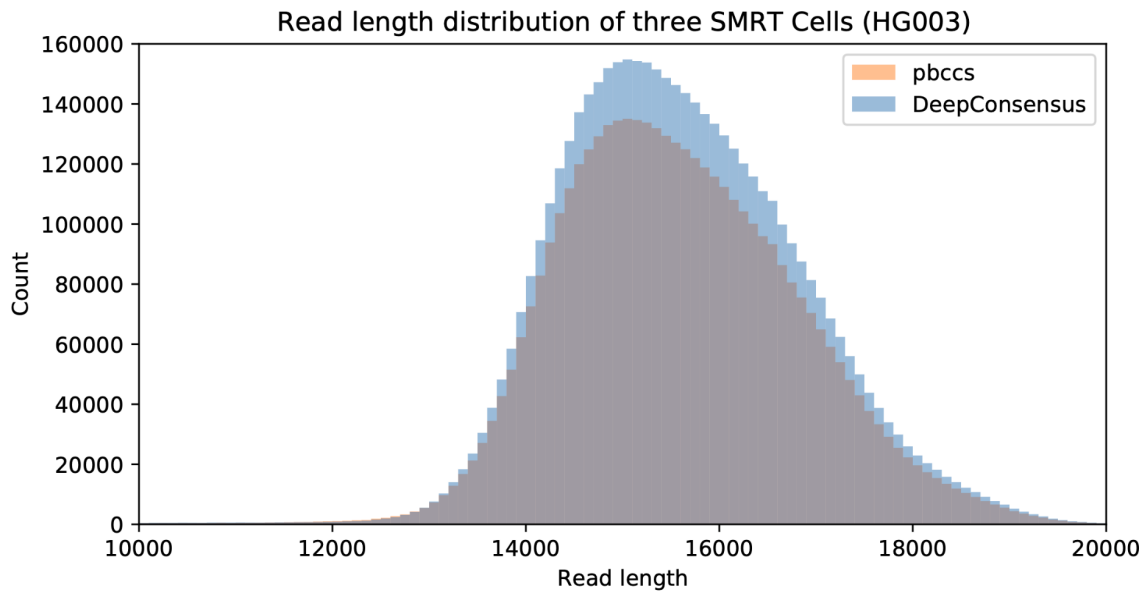

**Supplementary Figure 4:** Read length distribution of HG003 three SMRT Cells reads from pbccs and DeepConsensus.

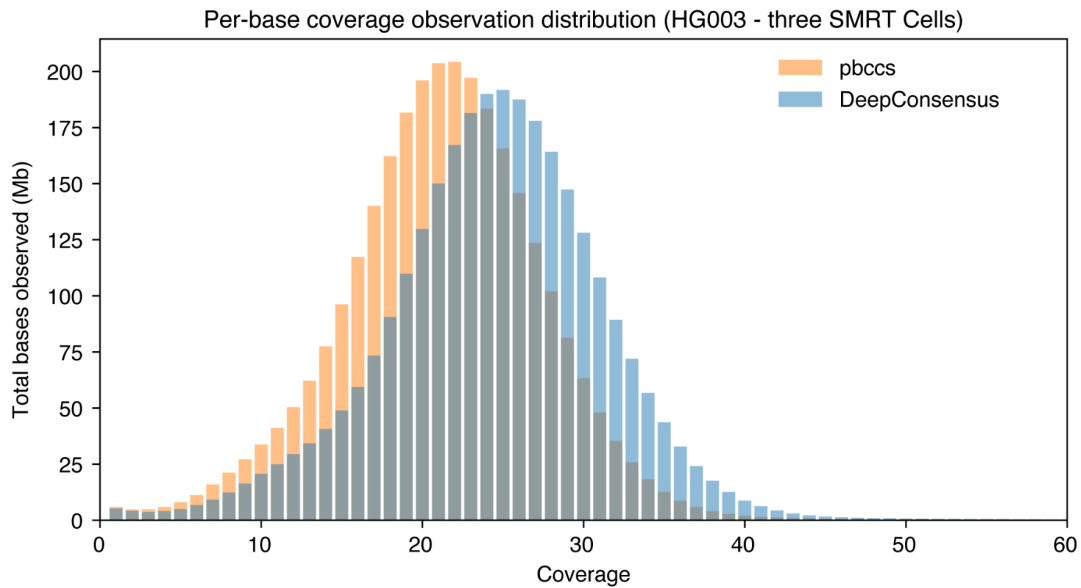

**Supplementary Figure 5:** Distribution of observed coverage of HG003 two SMRT Cells reads from pbccs and DeepConsensus.



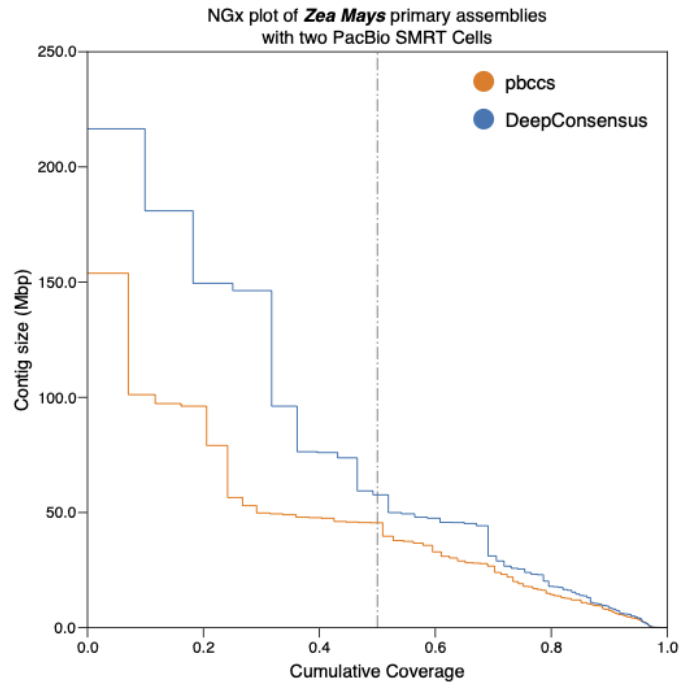

**Supplementary Figure 6:** Contiguity of the hifiasm assemblies of Maize B73 sample with reads from pbccs and DeepConsensus from two PacBio SMRT Cells.

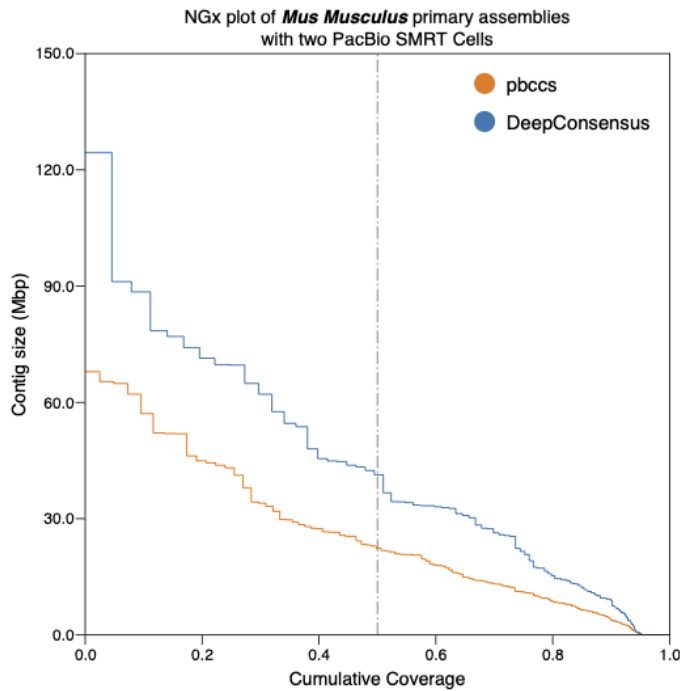

**Supplementary Figure 7:** Contiguity of the hifiasm assemblies of Mus Musculus sample with reads from pbccs and DeepConsensus from two PacBio SMRT Cells.

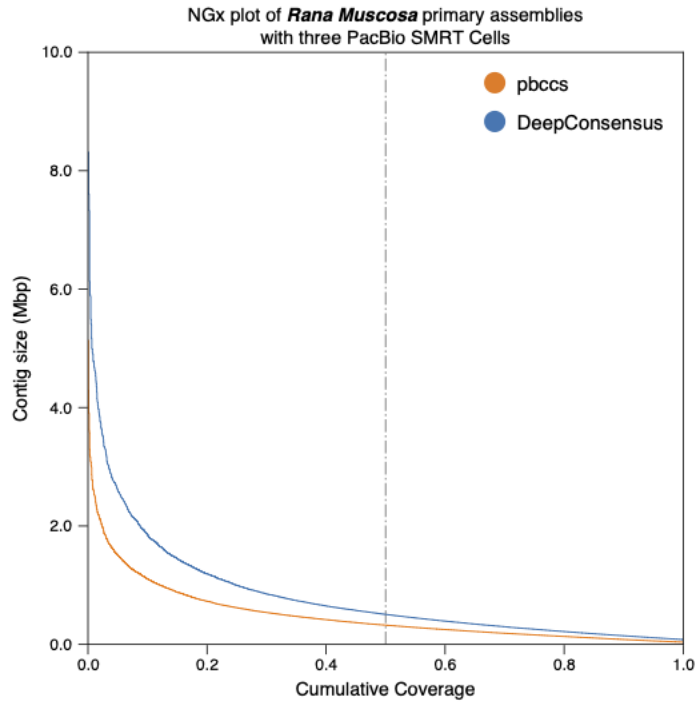

**Supplementary Figure 8:** Contiguity of the hifiasm assemblies of *Rana muscosa* sample with reads from pbccs and DeepConsensus from three PacBio SMRT Cells.

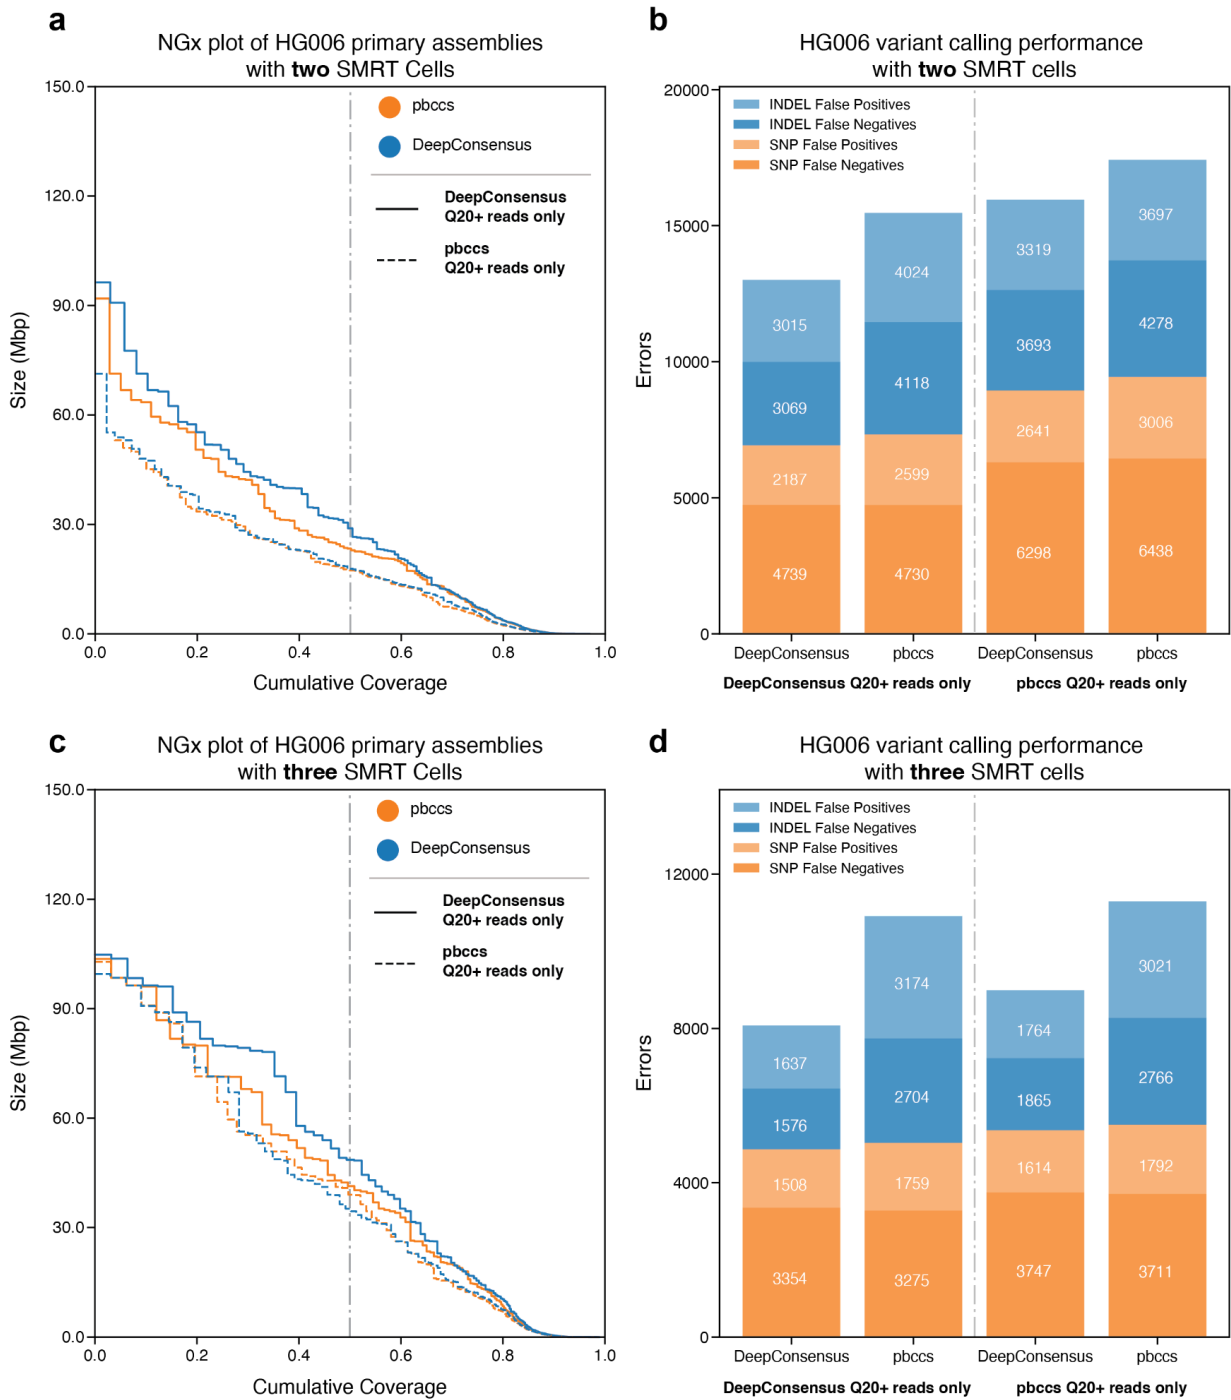

**Supplementary Figure 9:** To isolate the impact of accuracy improvements from coverage gains, analyses were run with the identical set of reads processed with DeepConsensus and pbccs. (a) Contiguity of the hifiasm assemblies using Q20+ reads from each method for two HG006 PacBio SMRT Cells. (b) HG006 variant calling performance using Q20+ reads from each method for two PacBio SMRT Cells. (c) Contiguity of the hifiasm assemblies using Q20+ reads from each method for three HG006 PacBio SMRT Cells. (d) HG006 variant calling performance using Q20+ reads from each method for three PacBio SMRT Cells.

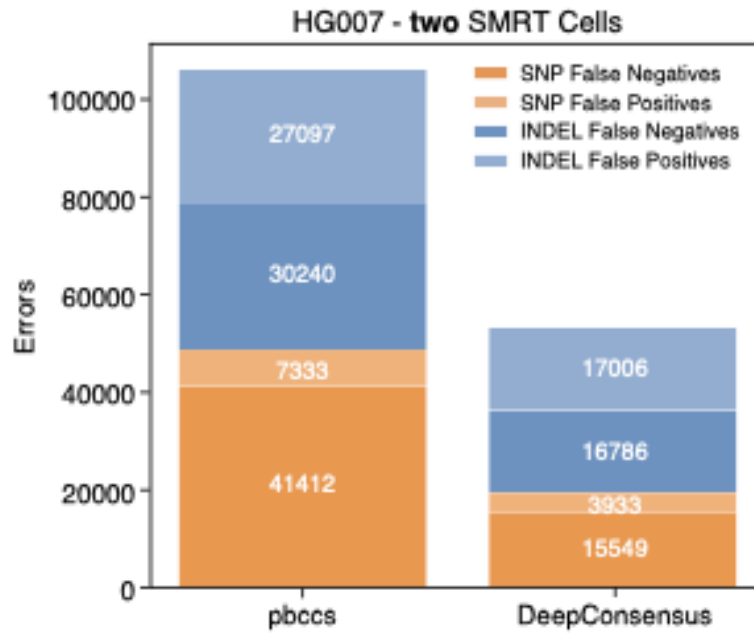

**Supplementary Figure 10:** Variant calling performance with pbccs and DeepConsensus reads on HG007 sample.

**a**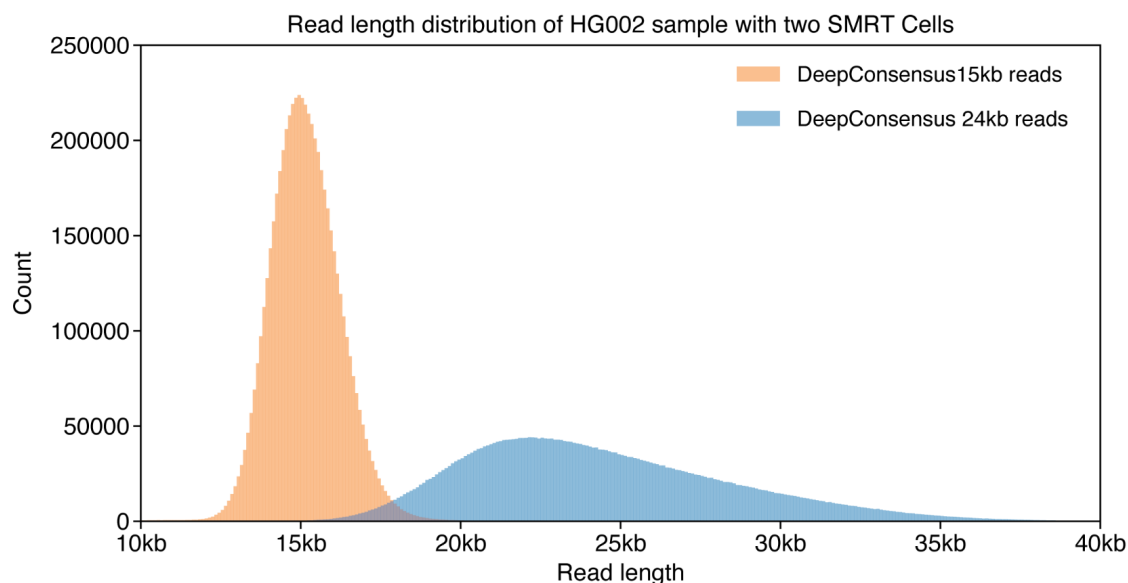**b**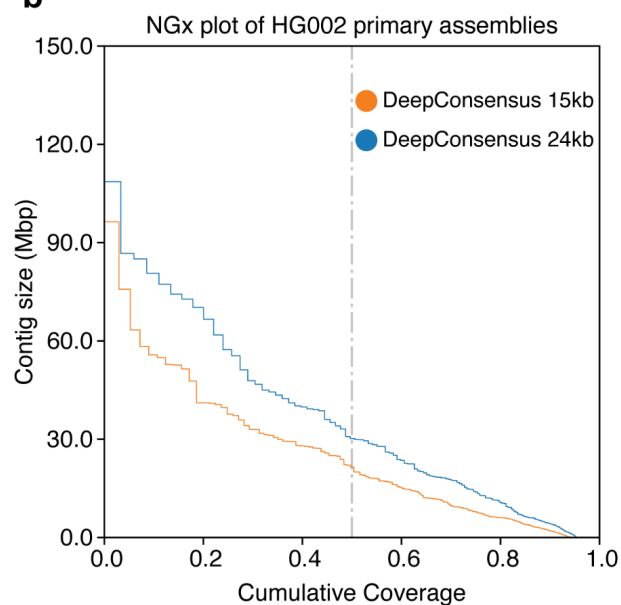**c**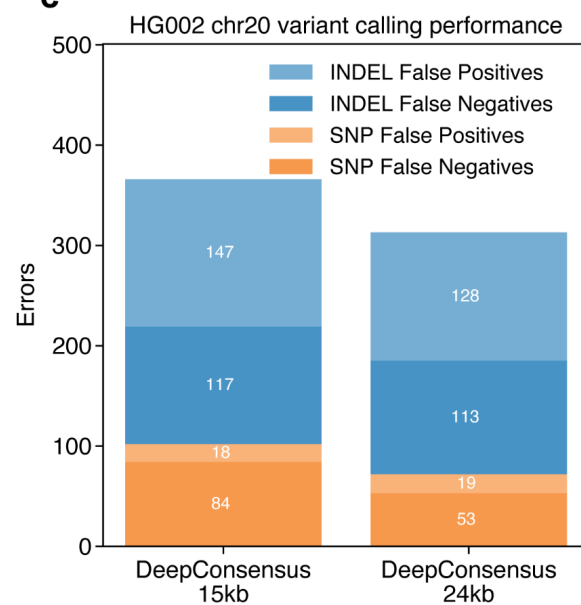

**Supplementary Figure 11: DeepConsensus with longer reads improves genome assembly contiguity.** (a) HG002 read length distribution for 15kb and 24kb DeepConsensus reads from two SMRT Cells. (b) Contiguity of the HG002 hifiasm assembly with 15kb and 24kb DeepConsensus reads from two SMRT Cells. (c) HG002 variant calling performance for 15kb and 24kb reads from DeepConsensus for two SMRT Cells.

## Supplementary tables

**Supplementary Table 1: Error reduction on the test split for DeepConsensus models using subsets of input signals and either the custom alignment loss or average cross-entropy loss computed over each predicted position.** The released DeepConsensus model uses alignment loss + bases + pulse width (PW) + interpulse duration (IP) + CCS sequence from pbccs + strand for each subread + signal-to noise-ratios (SN). Error reduction here is shown for chr19 and chr20 and includes reads <Q20, which is why the error reduction of the published model is slightly different from other comparisons.

| DeepConsensus experiment                                                  | Error reduction compared to pbccs |
|---------------------------------------------------------------------------|-----------------------------------|
| Alignment loss + bases                                                    | 11.11%                            |
| Alignment loss + bases + PW                                               | 20.96%                            |
| Alignment loss + bases + PW + IP                                          | 30.40%                            |
| Alignment loss + bases + PW + IP + CCS                                    | 31.81%                            |
| Alignment loss + bases + PW + IP + CCS + strand                           | 34.53%                            |
| Alignment loss + bases + PW + IP + CCS + strand + SN<br>(published model) | 37.57%                            |
| Cross-entropy loss + bases + PW + IP + CCS + strand + SN                  | 9.31%                             |

**Supplementary Table 2: Q-concordance comparison on 760 reads from chr20, which is the only chromosome available across all test datasets.**

| Dataset           | $Q_{concordance}$ |
|-------------------|-------------------|
| pbccs             | 27.5987           |
| <i>Lal et al.</i> | 29.1858           |
| DeepConsensus     | 29.9320           |

**Supplementary Table 3: Comparison of average number of errors per 10kbp for each error class on 760 reads from chr20, which is the only chromosome available across all test datasets.**

| Dataset           | All Errors<br>(per 10kbp) | Mismatch<br>(per 10kbp) | Non-Homopolymer<br>Insertion<br>(per 10kbp) | Non-Homopolymer<br>Deletion<br>(per 10kbp) | Homopolymer<br>Insertion<br>(per 10kbp) | Homopolymer<br>Deletion<br>(per 10kbp) |
|-------------------|---------------------------|-------------------------|---------------------------------------------|--------------------------------------------|-----------------------------------------|----------------------------------------|
| pbccs             | 17.29                     | 1.31                    | 1.13                                        | 0.43                                       | 7.54                                    | 6.88                                   |
| <i>Lal et al.</i> | 12.08                     | 1.08                    | 0.36                                        | 0.41                                       | 4.69                                    | 5.54                                   |
| DeepConsensus     | 10.09                     | 0.66                    | 0.18                                        | 0.51                                       | 3.66                                    | 5.08                                   |

**Supplementary Table 4: DeepConsensus and pbccs yield for reads at Q20 (predicted 99% accuracy) or higher.**

| Sample | Read Length | SMRT Cells | Yield    |               |
|--------|-------------|------------|----------|---------------|
|        |             |            | pbccs    | DeepConsensus |
| HG003  | 15 kb       | 2          | 46.15 Gb | 53.02 Gb      |
|        |             | 3          | 65.62 Gb | 75.41 Gb      |
| HG004  | 15 kb       | 2          | 45.55 Gb | 52.28 Gb      |
|        |             | 3          | 64.70 Gb | 74.26 Gb      |
| HG006  | 15kb        | 2          | 61.10 Gb | 69.24 Gb      |
|        |             | 3          | 83.17 Gb | 96.56 Gb      |
| HG007  | 15kb        | 2          | 39.56 Gb | 49.54 Gb      |

**Supplementary Table 5: QUAST reported assembly statistics of hifiasm assemblies with pbccs and DeepConsensus reads.**

| Sample        | SMRT Cells | Method        | N50 (Mb)     | NG50 (Mb)    | Assembly size (Gb) | Assembly completeness against GRCh38 (%) |
|---------------|------------|---------------|--------------|--------------|--------------------|------------------------------------------|
| HG003<br>15kb | 2          | pbccs         | 4.74         | 4.91         | 3.16               | <b>97.67</b>                             |
|               |            | DeepConsensus | <b>17.23</b> | <b>17.23</b> | 3.1                | 97.62                                    |
|               | 3          | pbccs         | 33.64        | 33.64        | 3.1                | 97.88                                    |
|               |            | DeepConsensus | <b>55.54</b> | <b>55.54</b> | 3.1                | <b>97.94</b>                             |
| HG004<br>15kb | 2          | pbccs         | 3.43         | 3.72         | 3.23               | 97.31                                    |
|               |            | DeepConsensus | <b>12.76</b> | <b>12.37</b> | 3.07               | <b>97.34</b>                             |
|               | 3          | pbccs         | 36.24        | 36.24        | 3.07               | 97.44                                    |
|               |            | DeepConsensus | <b>41.07</b> | <b>41.07</b> | 3.06               | <b>97.47</b>                             |
| HG006<br>15kb | 2          | pbccs         | 18.89        | 18.55        | 3.01               | 97.37                                    |
|               |            | DeepConsensus | <b>31.68</b> | <b>31.54</b> | 3.02               | <b>97.5</b>                              |
|               | 3          | pbccs         | 42.87        | 41.19        | 3.04               | 97.76                                    |
|               |            | DeepConsensus | <b>51.68</b> | <b>51.68</b> | 3.04               | <b>97.88</b>                             |
| HG007<br>15kb | 2          | pbccs         | 1.89         | 1.94         | 3.15               | 97.1                                     |
|               |            | DeepConsensus | <b>8.52</b>  | <b>8.48</b>  | 3.07               | <b>97.36</b>                             |

**Supplementary Table 6: YAK estimated phred-scale Q value of hifiasm assemblies with PBCCS and DeepConsensus reads.**

| Sample        | SMRT Cells | Method        | HAP1 Q        | HAP2 Q        |
|---------------|------------|---------------|---------------|---------------|
| HG003<br>15kb | 2          | pbccs         | 43.391        | 43.066        |
|               |            | DeepConsensus | <b>45.107</b> | <b>45.181</b> |
|               | 3          | pbccs         | 48.68         | 48.569        |
|               |            | DeepConsensus | <b>50.281</b> | <b>50.425</b> |
| HG004<br>15kb | 2          | pbccs         | 43.446        | 43.096        |
|               |            | DeepConsensus | <b>44.916</b> | <b>44.925</b> |
|               | 3          | pbccs         | 48.881        | 48.547        |
|               |            | DeepConsensus | <b>50.333</b> | <b>50.404</b> |
| HG006<br>15kb | 2          | pbccs         | 45.778        | 45.806        |
|               |            | DeepConsensus | <b>46.637</b> | <b>46.503</b> |
|               | 3          | pbccs         | 46.972        | 46.868        |
|               |            | DeepConsensus | <b>47.421</b> | <b>47.483</b> |
| HG007<br>15kb | 2          | pbccs         | 39.219        | 39.067        |
|               |            | DeepConsensus | <b>42.052</b> | <b>41.935</b> |

**Supplementary Table 7: Assembly-based small variant calling SNP evaluation of hifiasm assemblies with pbccs and DeepConsensus reads.**

| Sample        | SMRT Cells | Method        | SNPs           |                 |                 |               |               |               |
|---------------|------------|---------------|----------------|-----------------|-----------------|---------------|---------------|---------------|
|               |            |               | True positives | False negatives | False positives | Precision     | Recall        | F1-score      |
| HG003<br>15kb | 2          | pbccs         | 3011035        | 316460          | 31051           | 0.9898        | 0.9049        | 0.9454        |
|               |            | DeepConsensus | <b>3141265</b> | <b>186230</b>   | <b>28454</b>    | <b>0.991</b>  | <b>0.944</b>  | <b>0.9670</b> |
|               | 3          | pbccs         | 3235037        | 92458           | 9978            | 0.9969        | 0.9722        | 0.9844        |
|               |            | DeepConsensus | <b>3262865</b> | <b>64630</b>    | <b>8834</b>     | <b>0.9973</b> | <b>0.9806</b> | <b>0.9889</b> |
| HG004<br>15kb | 2          | pbccs         | 2902441        | 444169          | 34944           | 0.9881        | 0.8673        | 0.9238        |
|               |            | DeepConsensus | <b>3110169</b> | <b>236441</b>   | <b>31955</b>    | <b>0.9898</b> | <b>0.9293</b> | <b>0.9586</b> |
|               | 3          | pbccs         | 3220904        | 125706          | <b>12159</b>    | 0.9962        | 0.9624        | 0.9790        |
|               |            | DeepConsensus | <b>3268274</b> | <b>78336</b>    | 12173           | <b>0.9963</b> | <b>0.9766</b> | <b>0.9863</b> |
| HG006<br>15kb | 2          | pbccs         | 3093947        | 175913          | 13177           | 0.9958        | 0.9462        | 0.9703        |
|               |            | DeepConsensus | <b>3174650</b> | <b>95210</b>    | <b>11817</b>    | <b>0.9963</b> | <b>0.9709</b> | <b>0.9834</b> |
|               | 3          | pbccs         | 3198263        | 71597           | <b>10844</b>    | <b>0.9966</b> | 0.9781        | 0.9873        |
|               |            | DeepConsensus | <b>3214917</b> | <b>54943</b>    | 11265           | 0.9965        | <b>0.9832</b> | <b>0.9898</b> |
| HG007<br>15kb | 2          | pbccs         | 2620694        | 663768          | 52719           | 0.9803        | 0.7979        | 0.8797        |
|               |            | DeepConsensus | <b>2919344</b> | <b>365118</b>   | <b>46821</b>    | <b>0.9842</b> | <b>0.8888</b> | <b>0.9341</b> |



**Supplementary Table 8: Assembly-based small variant calling INDEL evaluation of hifiasm assemblies with pbccs and DeepConsensus reads.**

| Sample        | SMRT Cells | Method        | INDELs         |                 |                 |               |               |               |
|---------------|------------|---------------|----------------|-----------------|-----------------|---------------|---------------|---------------|
|               |            |               | True positives | False negatives | False positives | Precision     | Recall        | F1-score      |
| HG003<br>15kb | 2          | pbccs         | 439410         | 65091           | 221210          | 0.6725        | 0.871         | 0.7590        |
|               |            | DeepConsensus | <b>462380</b>  | <b>42121</b>    | <b>128197</b>   | <b>0.7888</b> | <b>0.9165</b> | <b>0.8478</b> |
|               | 3          | pbccs         | 479075         | 25426           | 48570           | 0.9108        | 0.9496        | 0.9298        |
|               |            | DeepConsensus | <b>485407</b>  | <b>19094</b>    | <b>25203</b>    | <b>0.9523</b> | <b>0.9622</b> | <b>0.9572</b> |
| HG004<br>15kb | 2          | pbccs         | 425671         | 84848           | 218034          | 0.6686        | 0.8338        | 0.7421        |
|               |            | DeepConsensus | <b>460158</b>  | <b>50361</b>    | <b>145983</b>   | <b>0.7656</b> | <b>0.9014</b> | <b>0.8279</b> |
|               | 3          | pbccs         | 478488         | 32031           | 56204           | 0.8981        | 0.9373        | 0.9173        |
|               |            | DeepConsensus | <b>488804</b>  | <b>21715</b>    | <b>32312</b>    | <b>0.94</b>   | <b>0.9575</b> | <b>0.9487</b> |
| HG006<br>15kb | 2          | pbccs         | 395841         | 32397           | 53935           | 0.8831        | 0.9243        | 0.9033        |
|               |            | DeepConsensus | <b>407094</b>  | <b>21144</b>    | <b>30961</b>    | <b>0.9312</b> | <b>0.9506</b> | <b>0.9408</b> |
|               | 3          | pbccs         | 409551         | 18687           | 22326           | 0.9497        | 0.9564        | 0.953         |
|               |            | DeepConsensus | <b>413053</b>  | <b>15185</b>    | <b>13441</b>    | <b>0.9694</b> | <b>0.9645</b> | <b>0.9669</b> |
| HG007<br>15kb | 2          | pbccs         | 318117         | 112209          | 526259          | 0.3825        | 0.7392        | 0.5041        |
|               |            | DeepConsensus | <b>366759</b>  | <b>63567</b>    | <b>244628</b>   | <b>0.6064</b> | <b>0.8523</b> | <b>0.7086</b> |

**Supplementary Table 9: Asmgene single-copy gene completeness analysis of hifiasm assemblies with pbccs and DeepConsensus reads.**

| Sample        | SMRT Cells | Method        | # Single copy ref | Single copy  |              | False duplications |            | Complete (%)  | Duplicated (%) |
|---------------|------------|---------------|-------------------|--------------|--------------|--------------------|------------|---------------|----------------|
|               |            |               |                   | Hap1         | Hap2         | Hap1               | Hap2       |               |                |
| HG003<br>15kb | 2          | pbccs         | 35374             | 32045        | 31682        | 623                | 375        | 90.076        | 1.411          |
|               |            | DeepConsensus | 35374             | <b>32882</b> | <b>32864</b> | <b>301</b>         | <b>203</b> | <b>92.93</b>  | <b>0.712</b>   |
|               | 3          | pbccs         | 35374             | 33852        | 33668        | 180                | 141        | 95.437        | 0.454          |
|               |            | DeepConsensus | 35374             | <b>34201</b> | <b>34302</b> | <b>126</b>         | <b>134</b> | <b>96.827</b> | <b>0.368</b>   |
| HG004<br>15kb | 2          | pbccs         | 35374             | 30973        | 30779        | 1250               | 647        | 87.284        | 2.681          |
|               |            | DeepConsensus | 35374             | <b>32306</b> | <b>31951</b> | <b>279</b>         | <b>202</b> | <b>90.825</b> | <b>0.68</b>    |
|               | 3          | pbccs         | 35374             | 33512        | 33183        | 225                | 142        | 94.271        | 0.519          |
|               |            | DeepConsensus | 35374             | <b>33897</b> | <b>33898</b> | <b>145</b>         | <b>140</b> | <b>95.826</b> | <b>0.403</b>   |
| HG006<br>15kb | 2          | pbccs         | 35374             | 33149        | 33145        | <b>184</b>         | <b>143</b> | 93.704        | <b>0.462</b>   |
|               |            | DeepConsensus | 35374             | <b>33893</b> | <b>33765</b> | 186                | <b>143</b> | <b>95.632</b> | 0.465          |
|               | 3          | pbccs         | 35374             | 34134        | 34021        | 146                | 139        | 96.335        | 0.403          |
|               |            | DeepConsensus | 35374             | <b>34399</b> | <b>34341</b> | <b>141</b>         | <b>122</b> | <b>97.162</b> | <b>0.372</b>   |
| HG007<br>15kb | 2          | pbccs         | 35374             | 29284        | 29056        | 649                | 453        | 82.462        | 1.558          |
|               |            | DeepConsensus | 35374             | <b>30935</b> | <b>30925</b> | <b>309</b>         | <b>226</b> | <b>87.437</b> | <b>0.756</b>   |

**Supplementary Table 10: Asmgene multi-copy gene completeness analysis of hifiasm assemblies with pbccs and DeepConsensus reads.**

| Sample        | SMRT Cells | Method        | # Multi copy ref | Multi copy  |            | Complete multi copy (%) | Missing multi copy (%) |
|---------------|------------|---------------|------------------|-------------|------------|-------------------------|------------------------|
|               |            |               |                  | Hap1        | Hap2       |                         |                        |
| HG003<br>15kb | 2          | pbccs         | 1253             | 968         | 936        | 75.978                  | 24.022                 |
|               |            | DeepConsensus | 1253             | <b>980</b>  | <b>982</b> | <b>78.292</b>           | <b>21.708</b>          |
|               | 3          | pbccs         | 1253             | <b>1006</b> | 983        | <b>79.37</b>            | <b>20.63</b>           |
|               |            | DeepConsensus | 1253             | 988         | <b>989</b> | 78.891                  | 21.109                 |
| HG004<br>15kb | 2          | pbccs         | 1253             | 932         | <b>959</b> | 75.459                  | 24.541                 |
|               |            | DeepConsensus | 1253             | <b>967</b>  | 942        | <b>76.177</b>           | <b>23.823</b>          |
|               | 3          | pbccs         | 1253             | <b>1007</b> | 974        | <b>79.05</b>            | <b>20.95</b>           |
|               |            | DeepConsensus | 1253             | 993         | <b>987</b> | 79.01                   | 20.99                  |
| HG006<br>15kb | 2          | pbccs         | 1253             | 964         | <b>995</b> | 78.172                  | 21.828                 |
|               |            | DeepConsensus | 1253             | <b>1019</b> | 957        | <b>78.851</b>           | <b>21.149</b>          |
|               | 3          | pbccs         | 1253             | 1003        | <b>995</b> | 79.729                  | 20.271                 |
|               |            | DeepConsensus | 1253             | <b>1042</b> | 972        | <b>80.367</b>           | <b>19.633</b>          |
| HG007<br>15kb | 2          | pbccs         | 1253             | 886         | 851        | 69.314                  | 30.686                 |
|               |            | DeepConsensus | 1253             | <b>920</b>  | <b>951</b> | <b>74.661</b>           | <b>25.339</b>          |

**Supplementary Table 11: QUASt reported assembly statistics of hifiasm assemblies for Maize and Mus Musculus.** We were not able to successfully run Quast on DeepConsensus Maize reads with the available resources.

| Sample       | Read length | SMRT Cells | Method        | N50 (Mb)     | NG50 (Mb)    | Assembly size (Gb) | Assembly completeness against reference |
|--------------|-------------|------------|---------------|--------------|--------------|--------------------|-----------------------------------------|
| Maize        | 15kb        | 2          | pbccs         | 45.5         | 45.5         | 2.19               | 98.689                                  |
|              |             |            | DeepConsensus | <b>57.6</b>  | <b>57.6</b>  | 2.19               | N/A                                     |
| Mus Musculus | 15kb        | 2          | pbccs         | 23.4         | 22.43        | 2.61               | 95.666                                  |
|              |             |            | DeepConsensus | <b>43.33</b> | <b>41.31</b> | 2.61               | <b>95.728</b>                           |

**Supplementary Table 12: Asmgene single-copy gene completeness analysis of Maize and Mus Musculus hifiasm assemblies with pbccs and DeepConsensus reads.**

| Sample       | Read length | SMRT Cells | Method        | # Single copy ref | Single copy  | False duplications | Complete (%)  | Duplicated (%) |
|--------------|-------------|------------|---------------|-------------------|--------------|--------------------|---------------|----------------|
|              |             |            |               |                   | Primary      | Primary            |               |                |
| Maize        | 15kb        | 2          | pbccs         | 30651             | <b>30562</b> | <b>50</b>          | <b>99.71</b>  | <b>0.163</b>   |
|              |             |            | DeepConsensus | 30651             | <b>30562</b> | 57                 | <b>99.71</b>  | 0.186          |
| Mus Musculus | 15kb        | 2          | pbccs         | 20179             | 20066        | 55                 | 99.44         | 0.273          |
|              |             |            | DeepConsensus | 20179             | <b>20084</b> | <b>53</b>          | <b>99.529</b> | <b>0.263</b>   |

**Supplementary Table 13: Asmgene multi-copy gene completeness analysis of Mus Musculus hifiasm assemblies with pbccs and DeepConsensus reads.**

| Sample       | Read length | SMRT Cells | Method        | # Multi copy ref | Multi copy | Complete multi copy (%) | Missing multi copy (%) |
|--------------|-------------|------------|---------------|------------------|------------|-------------------------|------------------------|
|              |             |            |               |                  | Primary    |                         |                        |
| Mus Musculus | 15kb        | 2          | pbccs         | 1015             | 856        | 84.335                  | 15.665                 |
|              |             |            | DeepConsensus | 1015             | <b>863</b> | <b>85.025</b>           | <b>14.975</b>          |

**Supplementary Table 14: QUASt reported assembly statistics of hifiasm assemblies with PBCCS and DeepConsensus on ZMWs above Q20 for each method. DC-HiFi-reads sample includes all reads that pass the Q20 filter for DeepConsensus. PBCCS-HiFi-reads includes all reads that pass the Q20 filter for PBCCS.**

| Sample                    | SMRT Cells | Method        | N50 (Mb) | NG50 (Mb) | Assembly size (Gb) | Assembly completeness against GRCh38 (%) |
|---------------------------|------------|---------------|----------|-----------|--------------------|------------------------------------------|
| HG006<br>DC-HiFi-reads    | 2          | pbccs         | 25.1     | 24.56     | 3.02               | 97.58                                    |
|                           |            | DeepConsensus | 31.68    | 31.54     | 3.02               | 97.5                                     |
|                           | 3          | pbccs         | 44.4     | 42.93     | 3.04               | 97.69                                    |
|                           |            | DeepConsensus | 51.68    | 51.68     | 3.04               | 97.88                                    |
| HG006<br>PBCCS-HiFi-reads | 2          | pbccs         | 18.89    | 18.55     | 3.01               | 97.37                                    |
|                           |            | DeepConsensus | 20.24    | 18.89     | 3.01               | 97.34                                    |
|                           | 3          | pbccs         | 42.87    | 41.19     | 3.04               | 97.76                                    |
|                           |            | DeepConsensus | 38.96    | 38.86     | 3.04               | 97.84                                    |

**Supplementary Table 15: YAK estimated phred-scale QV of hifiasm assemblies using ZMWs above Q20 for each method. DC-HiFi-reads sample includes all reads that pass the Q20 filter for DeepConsensus. PBCCS-HiFi-reads includes all reads that pass the Q20 filter for PBCCS.**

| Sample                    | SMRT Cells | Method        | HAP1 QV | HAP2 QV |
|---------------------------|------------|---------------|---------|---------|
| HG006<br>DC-HiFi-reads    | 2          | pbccs         | 45.346  | 45.375  |
|                           |            | DeepConsensus | 46.637  | 46.503  |
|                           | 3          | pbccs         | 46.399  | 46.212  |
|                           |            | DeepConsensus | 47.421  | 47.483  |
| HG006<br>PBCCS-HiFi-reads | 2          | pbccs         | 45.778  | 45.806  |
|                           |            | DeepConsensus | 46.995  | 46.902  |
|                           | 3          | pbccs         | 46.972  | 46.868  |
|                           |            | DeepConsensus | 47.786  | 47.727  |

**Supplementary Table 16: Assembly-based small variant calling evaluation of hifiasm assemblies with ZMWs above Q20 for each method. DC-HiFi-reads sample includes all reads that pass the Q20 filter for DeepConsensus. PBCCS-HiFi-reads includes all reads that pass the Q20 filter for PBCCS.**

| Sample                 | SMRT Cells | Method        | SNPs           |                 |                 |           |        |          |
|------------------------|------------|---------------|----------------|-----------------|-----------------|-----------|--------|----------|
|                        |            |               | True positives | False negatives | False positives | Precision | Recall | F1-score |
| HG006 DC-HiFi-reads    | 2          | pbccs         | 3163142        | 106718          | 14358           | 0.9955    | 0.9674 | 0.9812   |
|                        |            | DeepConsensus | 3174650        | 95210           | 11817           | 0.9963    | 0.9709 | 0.9834   |
|                        | 3          | pbccs         | 3209208        | 60652           | 10929           | 0.9966    | 0.9815 | 0.989    |
|                        |            | DeepConsensus | 3214917        | 54943           | 11265           | 0.9965    | 0.9832 | 0.9898   |
| HG006 PBCCS-HiFi-reads | 2          | pbccs         | 3093947        | 175913          | 13177           | 0.9958    | 0.9462 | 0.9703   |
|                        |            | DeepConsensus | 3091516        | 178344          | 11265           | 0.9964    | 0.9455 | 0.9702   |
|                        | 3          | pbccs         | 3198263        | 71597           | 10844           | 0.9966    | 0.9781 | 0.9873   |
|                        |            | DeepConsensus | 3196618        | 73242           | 8672            | 0.9973    | 0.9776 | 0.9874   |

**Supplementary Table 17: Assembly-based small variant calling evaluation of hifiasm assemblies with ZMWs above Q20 for each method. DC-HiFi-reads sample includes all reads that pass the Q20 filter for DeepConsensus. PBCCS-HiFi-reads includes all reads that pass the Q20 filter for PBCCS.**

| Sample                 | SMRT Cells | Method        | INDELs         |                 |                 |           |        |          |
|------------------------|------------|---------------|----------------|-----------------|-----------------|-----------|--------|----------|
|                        |            |               | True positives | False negatives | False positives | Precision | Recall | F1-score |
| HG006 DC-HiFi-reads    | 2          | pbccs         | 404384         | 23854           | 48707           | 0.8952    | 0.9443 | 0.9191   |
|                        |            | DeepConsensus | 407094         | 21144           | 30961           | 0.9312    | 0.9506 | 0.9408   |
|                        | 3          | pbccs         | 410918         | 17320           | 21145           | 0.9524    | 0.9596 | 0.956    |
|                        |            | DeepConsensus | 413053         | 15185           | 13441           | 0.9694    | 0.9645 | 0.9669   |
| HG006 PBCCS-HiFi-reads | 2          | pbccs         | 395841         | 32397           | 53935           | 0.8831    | 0.9243 | 0.9033   |
|                        |            | DeepConsensus | 396632         | 31606           | 29926           | 0.9317    | 0.9262 | 0.929    |
|                        | 3          | pbccs         | 409551         | 18687           | 22326           | 0.9497    | 0.9564 | 0.953    |
|                        |            | DeepConsensus | 411029         | 17209           | 12264           | 0.9718    | 0.9598 | 0.9658   |

**Supplementary Table 18: Asmgene single-copy gene completeness analysis of hifiasm assemblies with ZMWs above Q20 for each method. DC-HiFi-reads sample includes all reads that pass the Q20 filter for DeepConsensus. PBCCS-HiFi-reads includes all reads that pass the Q20 filter for PBCCS.**

| Sample                 | SMRT Cells | Method        | # Single copy ref | Single copy |       | False duplications |      | Complete (%) | Duplicated (%) |
|------------------------|------------|---------------|-------------------|-------------|-------|--------------------|------|--------------|----------------|
|                        |            |               |                   | Hap1        | Hap2  | Hap1               | Hap2 |              |                |
| HG006 DC-HiFi-reads    | 2          | pbccs         | 35374             | 33768       | 33777 | 208                | 136  | 95.473       | 0.486          |
|                        |            | DeepConsensus | 35374             | 33893       | 33765 | 186                | 143  | 95.632       | 0.465          |
|                        | 3          | pbccs         | 35374             | 34164       | 34332 | 137                | 158  | 96.817       | 0.417          |
|                        |            | DeepConsensus | 35374             | 34399       | 34341 | 141                | 122  | 97.162       | 0.372          |
| HG006 PBCCS-HiFi-reads | 2          | pbccs         | 35374             | 33149       | 33145 | 184                | 143  | 93.704       | 0.462          |
|                        |            | DeepConsensus | 35374             | 33111       | 33098 | 171                | 138  | 93.584       | 0.437          |
|                        | 3          | pbccs         | 35374             | 34134       | 34021 | 146                | 139  | 96.335       | 0.403          |
|                        |            | DeepConsensus | 35374             | 33837       | 34052 | 145                | 136  | 95.959       | 0.397          |

**Supplementary Table 19: Asmgene multi-copy gene completeness analysis of hifiasm assemblies with ZMWs above Q20 for each method. DC-HiFi-reads sample includes all reads that pass the Q20 filter for DeepConsensus. PBCCS-HiFi-reads includes all reads that pass the Q20 filter for PBCCS.**

| Sample                 | SMRT Cells | Method        | # Multi copy ref | Multi copy |      | Complete multi copy (%) | Missing multi copy (%) |
|------------------------|------------|---------------|------------------|------------|------|-------------------------|------------------------|
|                        |            |               |                  | Hap1       | Hap2 |                         |                        |
| HG006 DC-HiFi-reads    | 2          | pbccs         | 1253             | 967        | 1018 | 79.21                   | 20.79                  |
|                        |            | DeepConsensus | 1253             | 1019       | 957  | 78.851                  | 21.149                 |
|                        | 3          | pbccs         | 1253             | 972        | 1039 | 80.247                  | 19.753                 |
|                        |            | DeepConsensus | 1253             | 1042       | 972  | 80.367                  | 19.633                 |
| HG006 PBCCS-HiFi-reads | 2          | pbccs         | 1253             | 964        | 995  | 78.172                  | 21.828                 |
|                        |            | DeepConsensus | 1253             | 1041       | 951  | 79.489                  | 20.511                 |
|                        | 3          | pbccs         | 1253             | 1003       | 995  | 79.729                  | 20.271                 |
|                        |            | DeepConsensus | 1253             | 982        | 1040 | 80.686                  | 19.314                 |

**Supplementary Table 20: Whole genome variant calling results for DeepConsensus and pbccs reads.**

| Sample     | SMRT Cells | Method                        | Type  | Recall          | Precision       | F1 Score        | False Negatives | False Positives |
|------------|------------|-------------------------------|-------|-----------------|-----------------|-----------------|-----------------|-----------------|
| HG003 15kb | 2          | pbccs                         | INDEL | 0.969544        | 0.977546        | 0.973528        | 15365           | 11674           |
|            |            |                               | SNP   | 0.994683        | 0.998822        | 0.996748        | 17693           | 3907            |
|            |            | DeepConsensus + re-trained DV | INDEL | <b>0.976595</b> | <b>0.978256</b> | <b>0.977425</b> | <b>11808</b>    | <b>11383</b>    |
|            |            |                               | SNP   | 0.996891        | <b>0.99904</b>  | 0.997964        | 10345           | <b>3191</b>     |

|                                  |       |                                  |                 |                 |                 |                 |              |              |
|----------------------------------|-------|----------------------------------|-----------------|-----------------|-----------------|-----------------|--------------|--------------|
|                                  |       | DeepConsensus + DeepVariant v1.2 | INDEL           | 0.941865        | 0.937756        | 0.939806        | 29329        | 32591        |
|                                  |       |                                  | SNP             | <b>0.996948</b> | 0.999033        | <b>0.997989</b> | <b>10155</b> | 3214         |
|                                  | 3     | pbccs                            | INDEL           | 0.986755        | <b>0.988421</b> | 0.987587        | 6682         | <b>6069</b>  |
|                                  |       |                                  | SNP             | 0.998211        | 0.999261        | 0.998736        | 5954         | 2457         |
|                                  |       | DeepConsensus + re-trained DV    | INDEL           | <b>0.988248</b> | 0.988042        | <b>0.988145</b> | <b>5929</b>  | 6278         |
|                                  |       |                                  | SNP             | 0.998487        | <b>0.999382</b> | 0.998934        | 5035         | <b>2056</b>  |
| DeepConsensus + DeepVariant v1.2 | INDEL | 0.956454                         | 0.954828        | 0.95564         | 21969           | 23606           |              |              |
|                                  | SNP   | <b>0.99856</b>                   | 0.999318        | <b>0.998939</b> | <b>4791</b>     | 2268            |              |              |
| HG004<br>15kb                    | 2     | pbccs                            | INDEL           | 0.966677        | 0.976135        | 0.971383        | 17012        | 12540        |
|                                  |       |                                  | SNP             | 0.992949        | 0.99839         | 0.995662        | 23596        | 5363         |
|                                  |       | DeepConsensus + re-trained DV    | INDEL           | <b>0.9746</b>   | <b>0.977708</b> | <b>0.976152</b> | <b>12967</b> | <b>11797</b> |
|                                  |       |                                  | SNP             | <b>0.995903</b> | <b>0.998765</b> | <b>0.997332</b> | <b>13711</b> | <b>4123</b>  |
|                                  | 3     | pbccs                            | INDEL           | 0.98602         | 0.988074        | 0.987046        | 7137         | 6327         |
|                                  |       |                                  | SNP             | 0.99782         | 0.999242        | 0.99853         | 7297         | 2535         |
| DeepConsensus + re-trained DV    |       | INDEL                            | <b>0.988143</b> | <b>0.988352</b> | <b>0.988248</b> | <b>6053</b>     | <b>6190</b>  |              |
|                                  |       | SNP                              | <b>0.998234</b> | <b>0.999352</b> | <b>0.998793</b> | <b>5910</b>     | <b>2168</b>  |              |
| HG006<br>15kb                    | 2     | pbccs                            | INDEL           | 0.989999        | 0.991616        | 0.990807        | 4283         | 3705         |
|                                  |       |                                  | SNP             | 0.998028        | 0.999078        | 0.998553        | 6448         | 3014         |
|                                  |       | DeepConsensus + re-trained DV    | INDEL           | <b>0.992824</b> | <b>0.993181</b> | <b>0.993002</b> | <b>3073</b>  | <b>3017</b>  |
|                                  |       |                                  | SNP             | <b>0.998547</b> | <b>0.999332</b> | <b>0.99894</b>  | <b>4750</b>  | <b>2183</b>  |
|                                  | 3     | pbccs                            | INDEL           | 0.993529        | 0.993174        | 0.993351        | 2771         | 3024         |
|                                  |       |                                  | SNP             | 0.998865        | 0.999451        | 0.999158        | 3712         | 1795         |
| DeepConsensus + re-trained DV    |       | INDEL                            | <b>0.996324</b> | <b>0.996303</b> | <b>0.996314</b> | <b>1574</b>     | <b>1637</b>  |              |
|                                  |       | SNP                              | <b>0.998977</b> | <b>0.999538</b> | <b>0.999258</b> | <b>3346</b>     | <b>1509</b>  |              |
| HG007<br>15kb                    | 2     | pbccs                            | INDEL           | 0.929728        | 0.938265        | 0.933977        | 30240        | 27097        |
|                                  |       |                                  | SNP             | 0.987392        | 0.997745        | 0.992541        | 41412        | 7333         |
|                                  |       | DeepConsensus + re-trained DV    | INDEL           | <b>0.960992</b> | <b>0.96166</b>  | <b>0.961326</b> | <b>16786</b> | <b>17006</b> |
|                                  |       |                                  | SNP             | <b>0.995266</b> | <b>0.998799</b> | <b>0.997029</b> | <b>15549</b> | <b>3933</b>  |

**Supplementary Table 21: Error reduction in HG006 dipcall variant calling between PBCCS and DeepConsensus stratified by Genome in a Bottle region.**

| SMRT Cells | Stratification                    | Method        | Indel FN     | Indel FP     | SNP FN       | SNP FP       | Total Errors  | DC errors relative to PBCCS |
|------------|-----------------------------------|---------------|--------------|--------------|--------------|--------------|---------------|-----------------------------|
| 2          | <30% GC                           | pbccs         | 3848         | 5393         | 29676        | 5053         | 43970         | 54.50%                      |
|            |                                   | DeepConsensus | <b>2498</b>  | <b>3176</b>  | <b>14054</b> | <b>4151</b>  | <b>23879</b>  |                             |
|            | 30-55 % GC                        | pbccs         | 12625        | 20182        | 99606        | 19053        | 151466        | 55.60%                      |
|            |                                   | DeepConsensus | <b>8307</b>  | <b>10612</b> | <b>51065</b> | <b>14272</b> | <b>84256</b>  |                             |
|            | >55 % GC                          | pbccs         | 3573         | 7171         | 33486        | 6415         | 50645         | 56.30%                      |
|            |                                   | DeepConsensus | <b>2252</b>  | <b>3330</b>  | <b>18295</b> | <b>4629</b>  | <b>28506</b>  |                             |
|            | All Homopolymers                  | pbccs         | 903          | 1225         | 4871         | 960          | 7959          | 56.70%                      |
|            |                                   | DeepConsensus | <b>586</b>   | <b>642</b>   | <b>2548</b>  | <b>737</b>   | <b>4513</b>   |                             |
|            | AllTandemRepeats and HomoPolymers | pbccs         | 1887         | 2744         | 13603        | 2352         | 20586         | 60.90%                      |
|            |                                   | DeepConsensus | <b>1250</b>  | <b>1589</b>  | <b>7755</b>  | <b>1946</b>  | <b>12540</b>  |                             |
|            | Dinucleotide repeats >10bp        | pbccs         | 199          | 211          | 837          | 182          | 1429          | 61.50%                      |
|            |                                   | DeepConsensus | <b>144</b>   | <b>152</b>   | <b>441</b>   | <b>142</b>   | <b>879</b>    |                             |
|            | All                               | pbccs         | 20078        | 32966        | 164546       | 30928        | 248518        | 55.70%                      |
|            |                                   | DeepConsensus | <b>13101</b> | <b>17149</b> | <b>84972</b> | <b>23261</b> | <b>138483</b> |                             |
| 3          | <30% GC                           | pbccs         | 2089         | 2856         | 7270         | <b>2062</b>  | 14277         | 75.10%                      |
|            |                                   | DeepConsensus | <b>1701</b>  | <b>1717</b>  | <b>5223</b>  | 2081         | <b>10722</b>  |                             |
|            | 30-55 % GC                        | pbccs         | 7483         | 11163        | 32805        | 7993         | 59444         | 74.40%                      |
|            |                                   | DeepConsensus | <b>6000</b>  | <b>5868</b>  | <b>24503</b> | <b>7832</b>  | <b>44203</b>  |                             |
|            | >55 % GC                          | pbccs         | 2448         | 4082         | 18467        | 3326         | 28323         | 69.10%                      |
|            |                                   | DeepConsensus | <b>1886</b>  | <b>1773</b>  | <b>13254</b> | <b>2671</b>  | <b>19584</b>  |                             |
|            | All Homopolymers                  | pbccs         | 605          | 835          | 1751         | <b>419</b>   | 3610          | 70.00%                      |
|            |                                   | DeepConsensus | <b>434</b>   | <b>429</b>   | <b>1237</b>  | 427          | <b>2527</b>   |                             |
|            | AllTandemRepeats and HomoPolymers | pbccs         | 1250         | 1781         | 6154         | <b>1016</b>  | 10201         | 75.40%                      |
|            |                                   | DeepConsensus | <b>934</b>   | <b>964</b>   | <b>4706</b>  | 1094         | <b>7698</b>   |                             |
|            | Dinucleotide repeats >10bp        | pbccs         | 129          | 148          | 297          | <b>61</b>    | 635           | 79.40%                      |
|            |                                   | DeepConsensus | <b>123</b>   | <b>105</b>   | <b>201</b>   | 75           | <b>504</b>    |                             |
|            | All                               | pbccs         | 12116        | 18201        | 60996        | 13520        | 104833        | 73.10%                      |
|            |                                   | DeepConsensus | <b>9645</b>  | <b>9288</b>  | <b>44791</b> | <b>12877</b> | <b>76601</b>  |                             |



**Supplementary Table 22. Yield for 15kb and 24kb reads at Q20 used for assembly and variant calling experiments.**

| Sample | Read Length | SMRT Cells | Method        | Yield            |
|--------|-------------|------------|---------------|------------------|
| HG002  | 15 kb       | 2          | DeepConsensus | 88.98 Gb         |
|        | 24 kb       | 2          | DeepConsensus | <b>103.61 Gb</b> |

**Supplementary Table 23: QUAST reported assembly statistics of hifiasm assemblies with 15kb and 24kb reads.**

| Sample | Read length | SMRT Cells | Method        | N50 (Mb)     | NG50 (Mb)    | Assembly size (Gb) | Assembly completeness against GRCh38 |
|--------|-------------|------------|---------------|--------------|--------------|--------------------|--------------------------------------|
| HG002  | 15kb        | 2          | DeepConsensus | 24.81        | 24.81        | 3.09               | 97.654                               |
|        | 24kb        | 2          | DeepConsensus | <b>33.14</b> | <b>34.05</b> | 3.13               | <b>97.68</b>                         |

**Supplementary Table 24: YAK estimated phred-scale Q value of hifiasm assemblies with 15kb and 24kb reads.**

| Sample | Read length | SMRT Cells | Method        | HAP1 Q        | HAP2 Q        |
|--------|-------------|------------|---------------|---------------|---------------|
| HG002  | 15kb        | 2          | DeepConsensus | <b>51.879</b> | <b>51.534</b> |
|        | 24kb        | 2          | DeepConsensus | 50.901        | 50.614        |

**Supplementary Table 25: Assembly-based small variant calling SNP evaluation of hifiasm assemblies with 15kb and 24kb reads.**

| Sample | Read length | SMRT Cells | Method        | SNPs           |                 |                 |               |               |              |
|--------|-------------|------------|---------------|----------------|-----------------|-----------------|---------------|---------------|--------------|
|        |             |            |               | True positives | False negatives | False positives | Precision     | Recall        | F1-score     |
| HG002  | 15kb        | 2          | DeepConsensus | <b>3318960</b> | <b>46167</b>    | <b>7073</b>     | <b>0.9979</b> | <b>0.9863</b> | <b>0.992</b> |
|        | 24kb        | 2          | DeepConsensus | 3312496        | 52631           | 7404            | 0.9978        | 0.9844        | 0.991        |

**Supplementary Table 26: Assembly-based small variant calling INDEL evaluation of hifiasm assemblies with 15kb and 24kb reads.**

| Sample | Read length | SMRT Cells | Method        | INDELs         |                 |                 |               |               |               |
|--------|-------------|------------|---------------|----------------|-----------------|-----------------|---------------|---------------|---------------|
|        |             |            |               | True positives | False negatives | False positives | Precision     | Recall        | F1-score      |
| HG002  | 15kb        | 2          | DeepConsensus | 507578         | 17891           | 19463           | 0.9643        | 0.966         | 0.9651        |
|        | 24kb        | 2          | DeepConsensus | <b>511634</b>  | <b>13835</b>    | <b>19131</b>    | <b>0.9652</b> | <b>0.9737</b> | <b>0.9694</b> |

**Supplementary Table 27: Asmgene single-copy gene completeness analysis of hifiasm assemblies with 15kb and 24kb reads.**

| Sample | Read length | SMRT Cells | Method        | # Single copy ref | Single copy  |              | False duplications |            | Complete (%)  | Duplicated (%) |
|--------|-------------|------------|---------------|-------------------|--------------|--------------|--------------------|------------|---------------|----------------|
|        |             |            |               |                   | Hap1         | Hap2         | Hap1               | Hap2       |               |                |
| HG002  | 15kb        | 2          | DeepConsensus | 35374             | <b>34553</b> | <b>34353</b> | <b>153</b>         | <b>114</b> | <b>97.396</b> | <b>0.377</b>   |
|        | 24kb        | 2          | DeepConsensus | 35374             | 34517        | 34269        | 191                | 189        | 97.227        | 0.537          |

**Supplementary Table 28: Asmgene multi-copy gene completeness analysis of hifiasm assemblies with 15kb and 24kb reads.**

| Sample | Read length | SMRT Cells | Method        | # Multi copy ref | Multi copy  |            | Complete multi copy (%) | Missing multi copy (%) |
|--------|-------------|------------|---------------|------------------|-------------|------------|-------------------------|------------------------|
|        |             |            |               |                  | Hap1        | Hap2       |                         |                        |
| HG002  | 15kb        | 2          | DeepConsensus | 1253             | 1024        | 904        | 76.935                  | 23.065                 |
|        | 24kb        | 2          | DeepConsensus | 1253             | <b>1043</b> | <b>985</b> | <b>80.926</b>           | <b>19.074</b>          |

**Supplementary Table 29: Chr20 variant calling results for DeepConsensus reads.**

| Sample        | SMRT Cells | Method        | Type  | Recall          | Precision       | F1 Score        | False Negatives | False Positives |
|---------------|------------|---------------|-------|-----------------|-----------------|-----------------|-----------------|-----------------|
| HG002<br>15kb | 2          | DeepConsensus | INDEL | 0.989606        | 0.987434        | 0.988518        | 117             | 147             |
|               |            |               | SNP   | 0.998822        | <b>0.999748</b> | 0.999285        | 84              | <b>18</b>       |
| HG002<br>24kb | 2          | DeepConsensus | INDEL | <b>0.989961</b> | <b>0.989044</b> | <b>0.989502</b> | <b>113</b>      | <b>128</b>      |
|               |            |               | SNP   | <b>0.999257</b> | 0.999734        | <b>0.999495</b> | <b>53</b>       | 19              |
